# Supplementary material
Source: publisher figshare collection journal article supplement (https://aacr.figshare.com/articles/dataset/_/22674270)
Supplement: Supplementary file 1 [file 40243596]

**A** Inactivation of *MiK1*

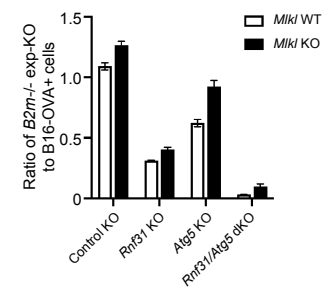

**B** Co-localization of cleaved caspase 8 and LC3B

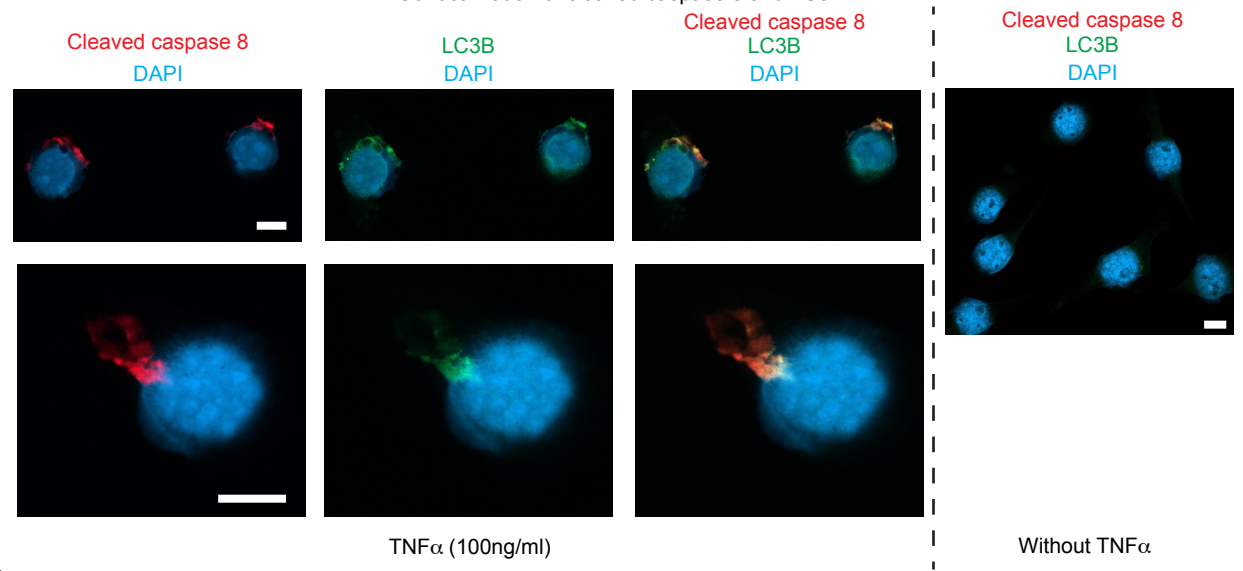

**C** Upregulation of genes by IFN $\gamma$  and TNF $\alpha$

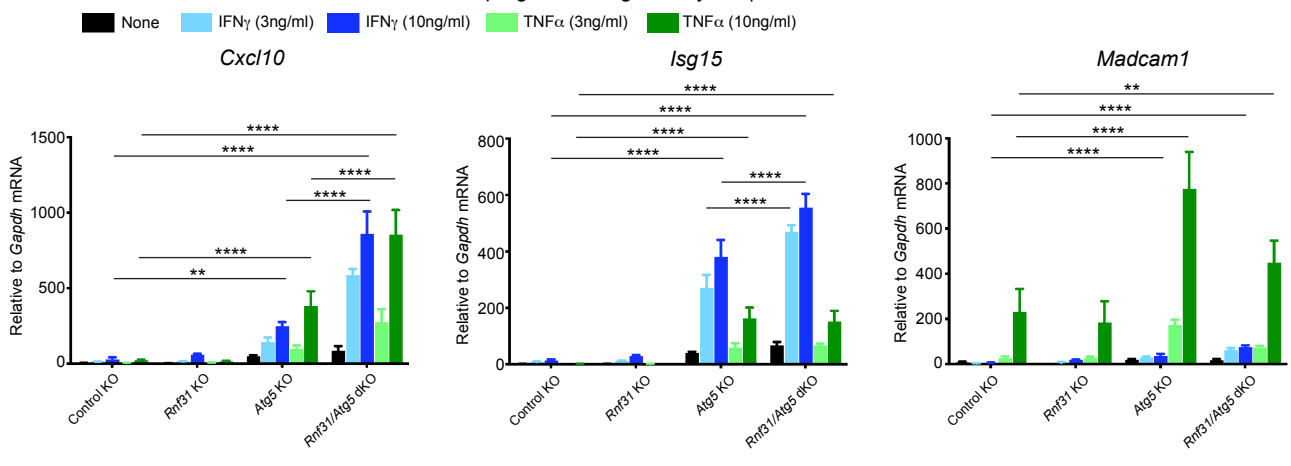

**Supplementary Fig. S6. Functional links between autophagy and cytokine signaling pathways.**

(A) Impact of *Mkl1* inactivation on killing of *Rnf31* or *Atg5* deficient tumor cells (B16F10) by CD8 T cells. B16-Ova and *B2m*<sup>-/-</sup> exp-KO cells were co-cultured for 48h without or with OT-I T cells (E:T = 1:3). Ratio of *B2m*<sup>-/-</sup> exp-KO cells to B16-Ova cells is shown (n = 4/group). Data are representative of two experiments. Data are depicted as the mean ± SEM.

(B) Co-localization of cleaved caspase 8 and LC3B. Immunofluorescence staining of B16 *Rnf31*<sup>-/-</sup> cells after 4.5h of treatment with or without 100 ng/ml TNF $\alpha$ . Cleaved caspase 8 (red), LC3B (green) and DAPI (light blue). Scale bar represents 10  $\mu$ m.

(C) RT-qPCR analysis of *Cxcl10*, *Isg15*, and *Madcam1* mRNA levels in B16 *B2m*<sup>-/-</sup> ctrl-KO cells and B16 *B2m*<sup>-/-</sup> exp-KO cells (triplicate measurements). Data are representative of two experiments. Data are depicted as the mean ± SEM. To determine statistical significance, a two-way ANOVA with Tukey's multiple comparison test was used. \*\*\*\*p < 0.0001; \*\*p < 0.01.
